# Supplementary material for: Toxic tall fescue grazing increases susceptibility of the Angus steer fecal microbiota and plasma/urine metabolome to environmental effects
Source: PubMed Central journal article supplement (PMC7016188; doi:10.1038/s41598-020-59104-1), 2020-02-12
Supplement: 41598_2020_59104_MOESM1_ESM.pdf [file 41598_2020_59104_MOESM1_ESM.pdf]

**Toxic tall fescue grazing increases susceptibility of the Angus steer fecal microbiota and plasma/urine metabolome to environmental effects**

**Ryan S. Mote<sup>1,2</sup>, Nicholas S. Hill<sup>3</sup>, Joseph H. Skarlupka<sup>4</sup>, ViLinh T. Tran<sup>5</sup>, Douglas I. Walker<sup>5</sup>, Zachary B. Turner<sup>2</sup>, Zachary P. Sanders<sup>3</sup>, Dean P. Jones<sup>5</sup>, Garret Suen<sup>4</sup>, Nikolay M. Filipov<sup>1,2\*</sup>**

<sup>1</sup> Interdisciplinary Toxicology Program, <sup>2</sup> Department of Physiology and Pharmacology,

<sup>3</sup> Department of Crop and Soil Sciences, University of Georgia, Athens, GA;

<sup>4</sup> Department of Bacteriology, University of Wisconsin – Madison, Madison, WI;

<sup>5</sup> Department of Medicine, Division of Pulmonary, Allergy, and Critical Care Medicine, Emory University, Atlanta, GA.

Supplemental Figures.

Fecal 16S PLS-DA

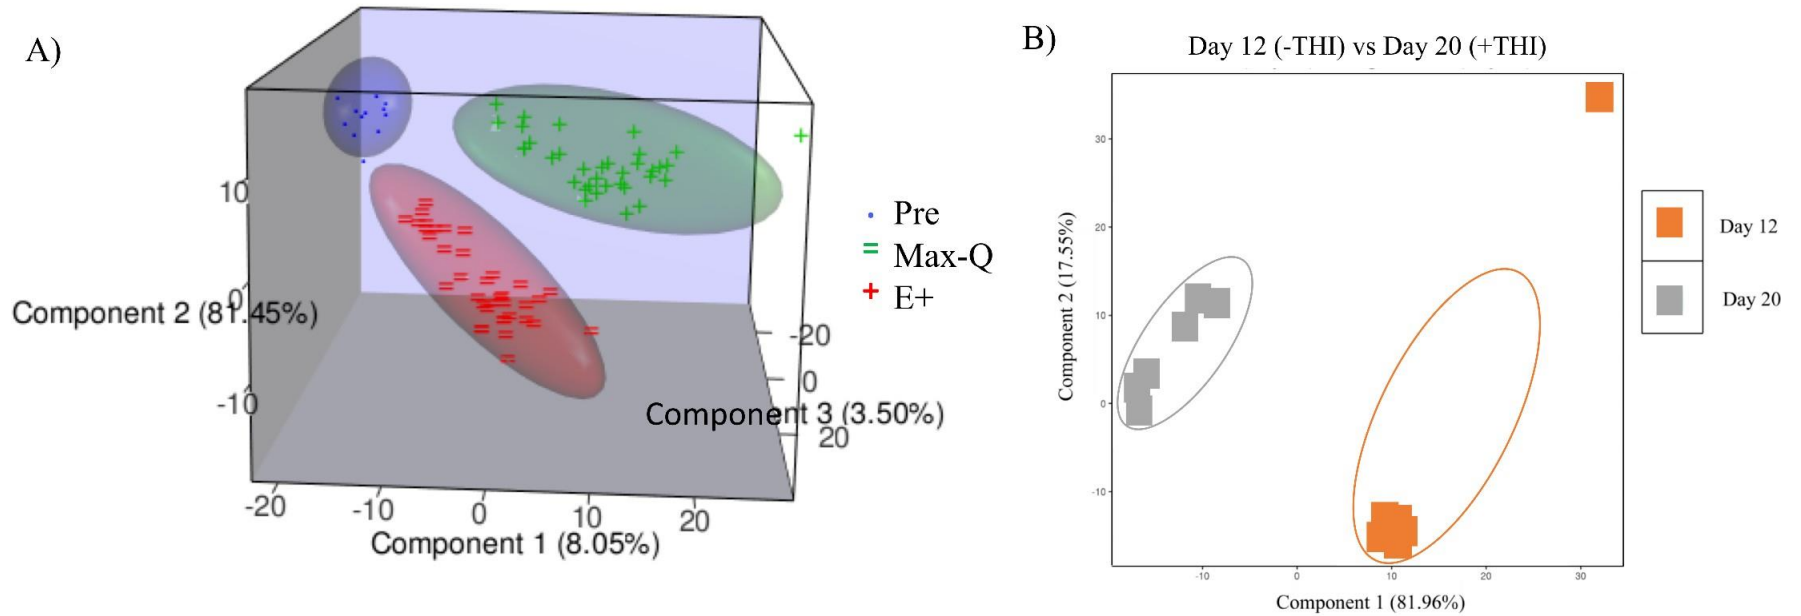

**Fig. S1.** Partial least squares discriminant analysis (PLS-DA) plots analyzing the fecal microbiota of Angus steers before pasture placement (blue) or grazing either a novel, non-toxic (Max-Q; n = 6; green) or toxic (E+; n = 6; red) endophyte-infected tall fescue (A) over the course of a 26-day grazing trial or (B) E+ grazing steers on Day 12 (-THI; orange) or Day 20 (+THI; gray) post pasture assignment.

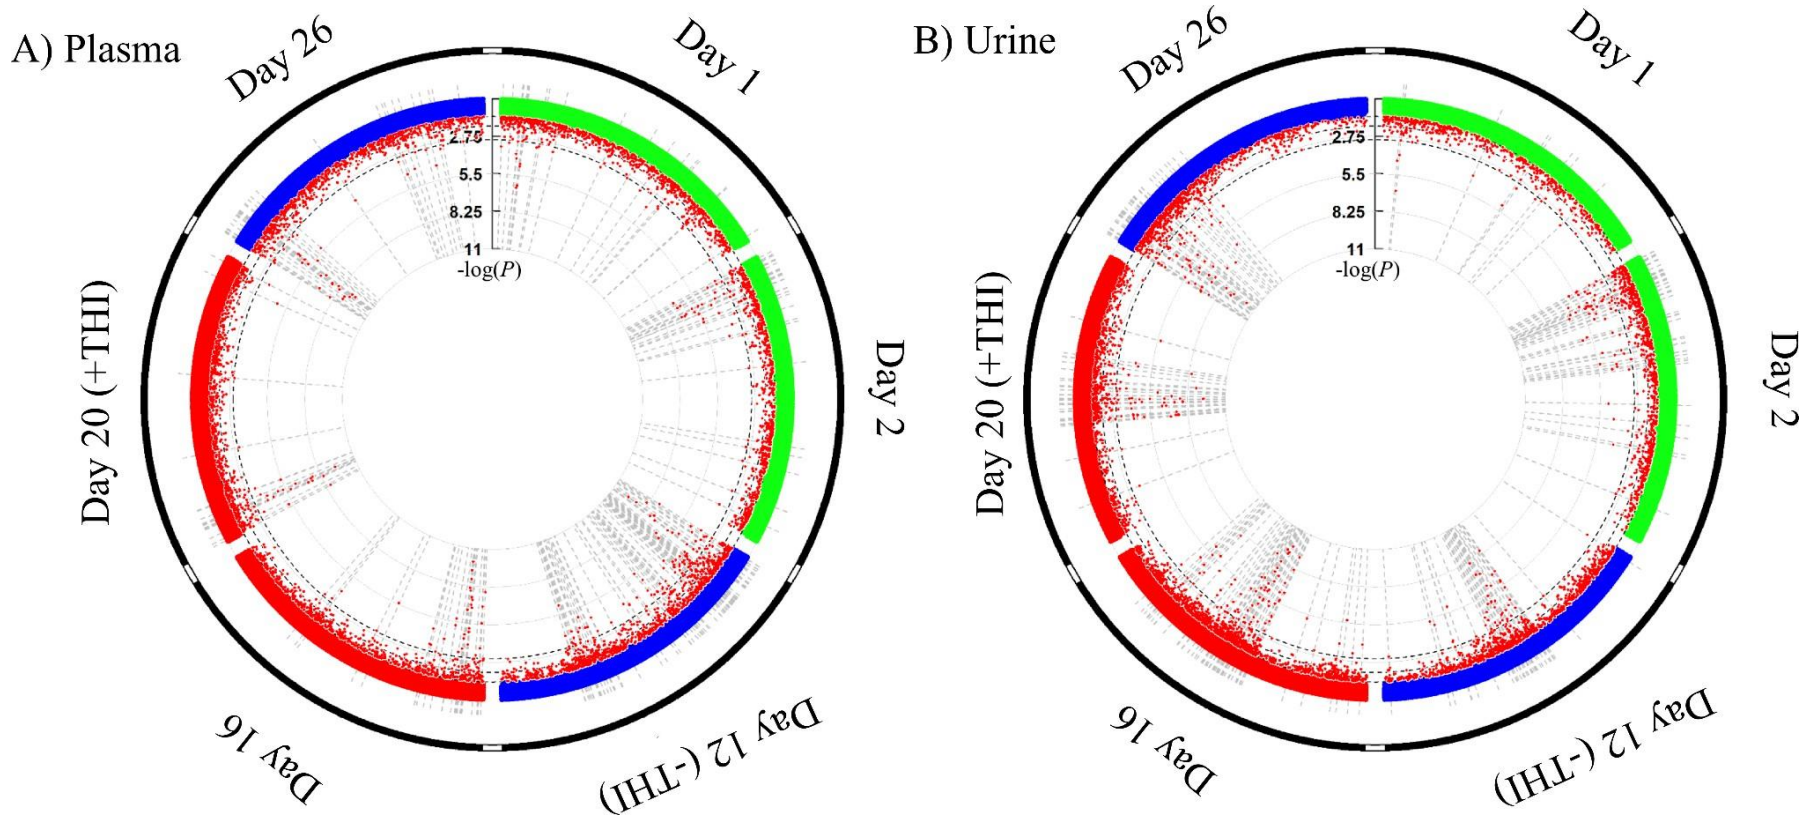

**Fig. S2.** Circular Manhattan plots representing high-resolution metabolomics (HRM) features in the (A) plasma and (B) urine of Angus steers grazing either a novel, non-toxic (Max-Q;  $n = 6$ ) or toxic (E+;  $n = 6$ ) endophyte-infected tall fescue over the course of a 26 day grazing trial. Red dots indicates HRM features were significantly affected by E+ treatment (FDR corrected  $P < 0.05$ ) and the more central the dots the greater the significance.

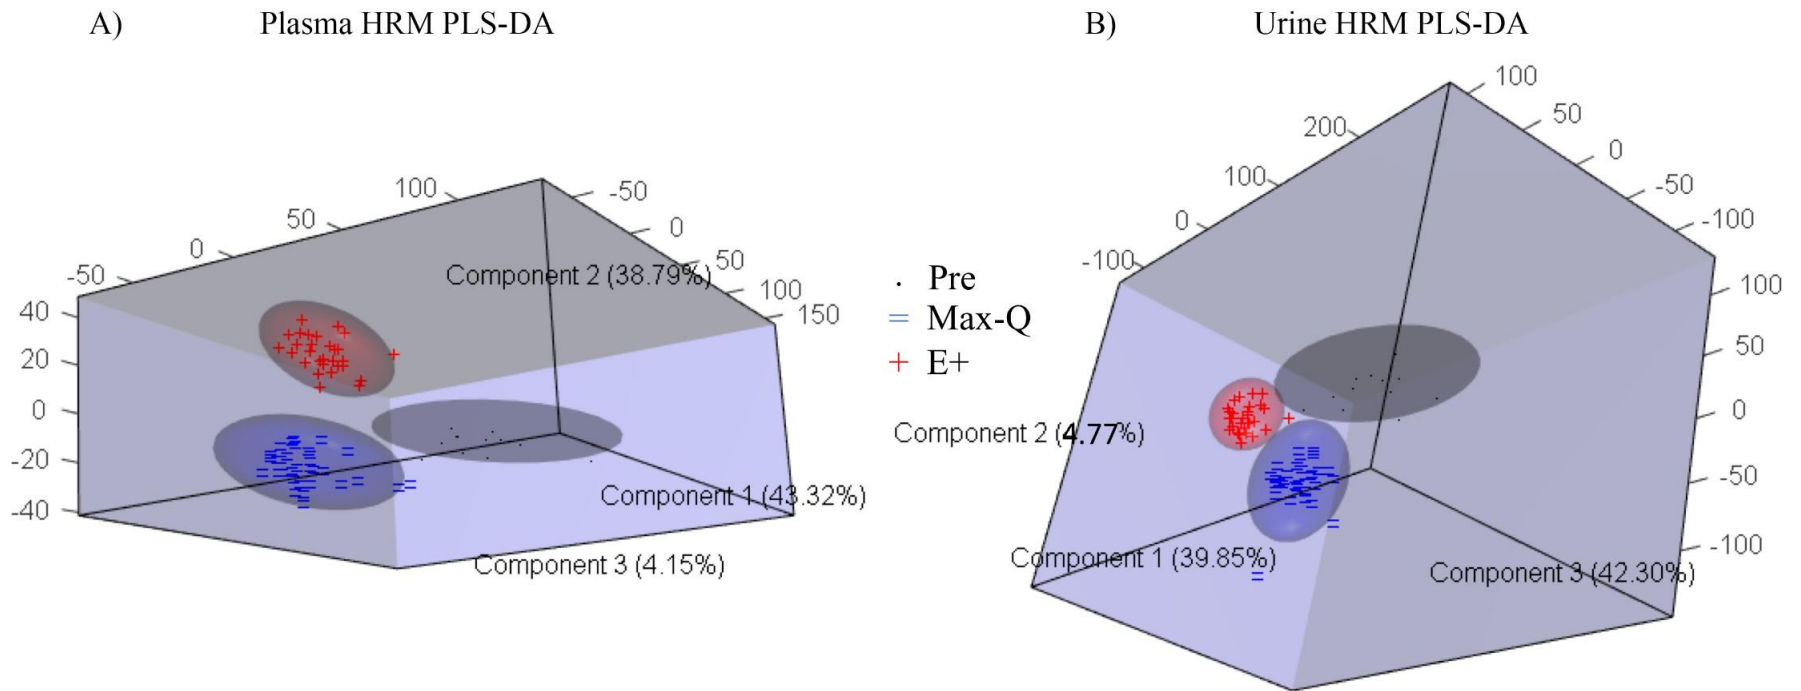

**Fig. S3.** Partial least squares discriminant analysis (PLS-DA) plots analyzing the fecal microbiota of Angus steers before pasture placement (blue) or grazing either a novel, non-toxic (Max-Q; n = 6; green) or toxic (E+; n = 6; red) endophyte-infected tall fescue over the course of a 26-day grazing trial in the **(A)** plasma and **(B)** urine.



# A) Overall; Max-Q

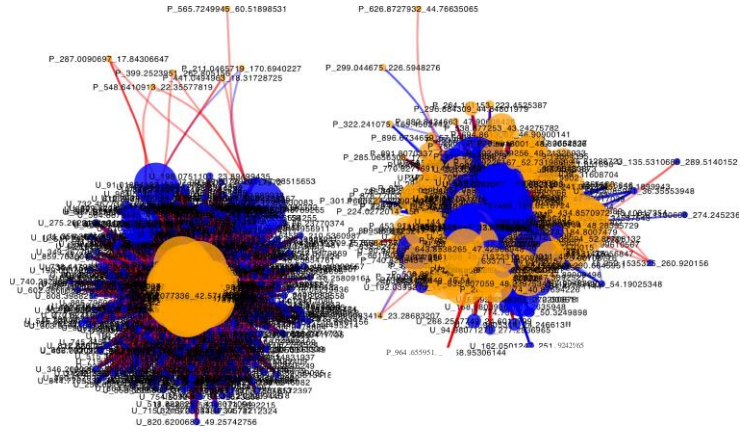

# E+

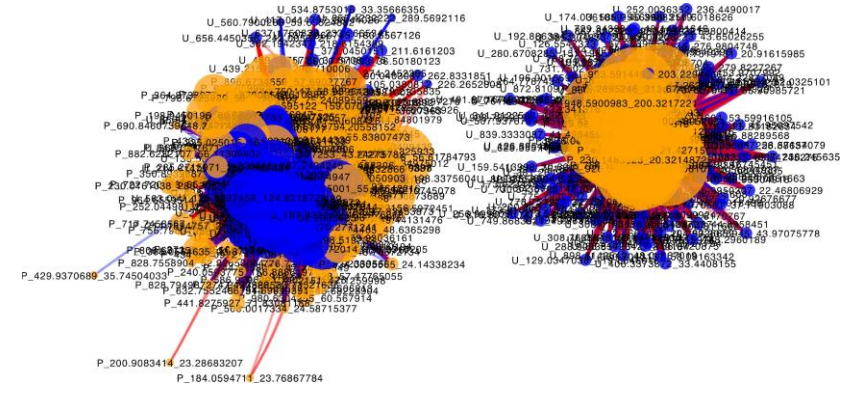

# B) Day 12 (-THI); Max-Q

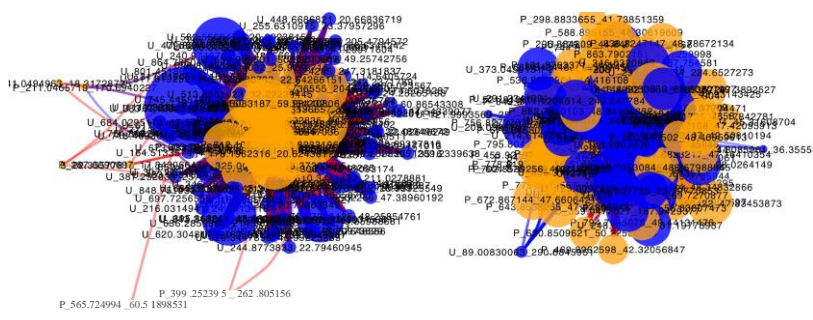

# E+

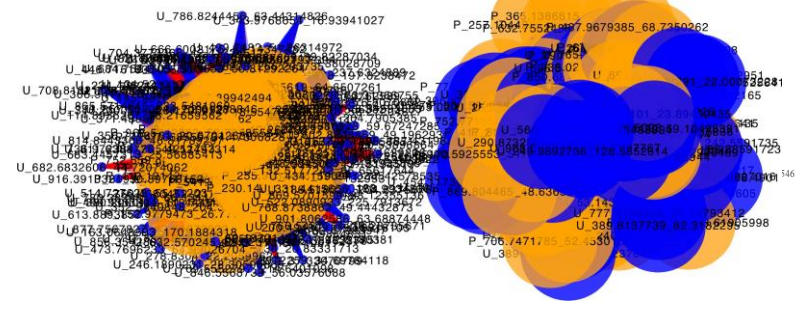

# C) Day 20(+THI); Max-Q

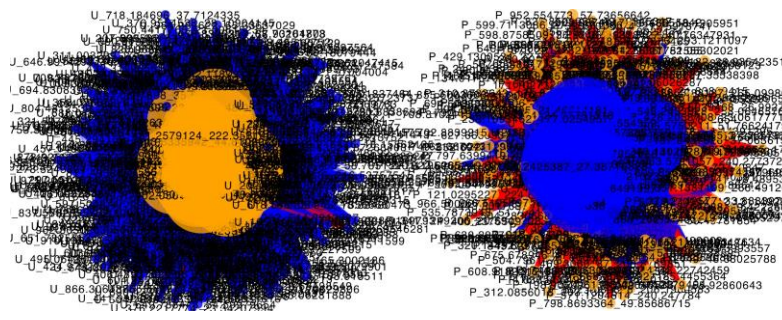

# E+

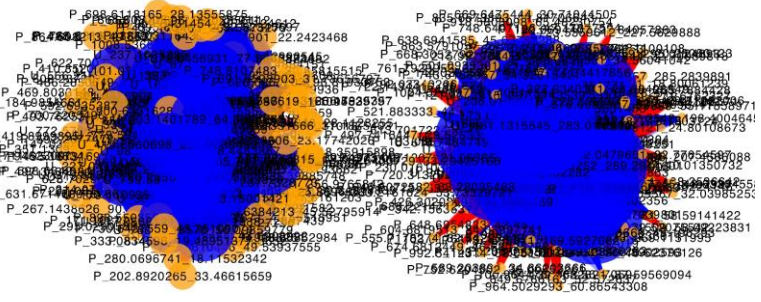

**Figure S4.** Bipartite network of plasma (orange) and urine (blue) high-resolution metabolomics (HRM) features that were selected by sparse partial least squares regression (sPLS; top 100 plasma and urine HRM features [X and Y matrix, respectively]) using the *mixOmics* R package and were highly correlated ( $|r| > 0.7$ ) for steers grazing a: **(A)** novel, non-toxic tall fescue (Max-Q) or toxic tall fescue (E+) throughout the grazing trial; **(B)** Max-Q or E+ tall fescue on Day 12 (-THI); **(C)** Max-Q or E+ tall fescue on Day 20 (+THI). Size of the node is respective of the metabolites between centrality within the respective networks.
